# Supplementary material for: Synthesis and characterization of amphiphilic miktoarm star polymers based on sydnone-maleimide double cycloaddition
Source: Royal Society of Chemistry journal article supplement (doi:10.1039/c7py01476g), 2017-11-28
Supplement: c7py01476g1.pdf [file c7py01476g1.pdf]

## Supporting Information

# Synthesis and Characterization of Amphiphilic Miktoarm Star Polymers Based on Sydnone- Maleimide Double Cycloaddition

*Jing Zhang, Qingzhong Zhang, Shuafeng Zhou, Yuping Liu, Wei Huang\**

Department of Chemistry, School of Chemistry and Molecular Engineering, 500 Dongchuan  
Road, Shanghai 200241, People's Republic of China

\*Corresponding Author

E-mail: whuang@chem.ecnu.edu.cn; Tel.: +86-21-54340104; Fax: +86-21-54340119.

**Synthesis of furan-*N*-propargylmaleimide (7).** A three-necked flask was charged with a mixture of maleimide 5.0 g (51.5 mmol) and diethyl ether 100 mL, and then furan 10.51 g (154.5 mmol) was added to the solution whilst stirring. The mixture was stirred at 95 °C for about 12 h under nitrogen. After removing the solvent under reduced pressure, the crude product was purified by silica gel chromatography to give the furan-maleimide 7.51 g. The obtained furan-maleimide (**FM**) 4.13 g (25.0 mmol) was dissolved in dried DMF 50 mL, and then propargyl bromide 8.85 g (75.0 mmol) and K<sub>2</sub>CO<sub>3</sub> 3.45 g (25.0 mmol) were added to the solution. The mixture was stirred at 65 °C for 12 h under nitrogen. The insoluble powder was filtered and the solvent was removed under reduced pressure. The crude product was purified by silica gel chromatography to give the **furan-*N*-propargylmaleimide (7)** 4.61 g, 91 % yield. <sup>1</sup>H NMR (500MHz, CDCl<sub>3</sub>, δ, ppm): 6.55 (t, *J*=0.9 Hz, 2H, **CH=CH**), 5.33 (t, *J*=0.9 Hz, 2H, **CHOCH**), 4.26 (d, *J*=2.5 Hz, 2H, **NCH<sub>2</sub>C**), 2.93 (s, 2H, **COCH(CH)CH(CH)CO**), 2.22 (s, 1H, **CCH**).

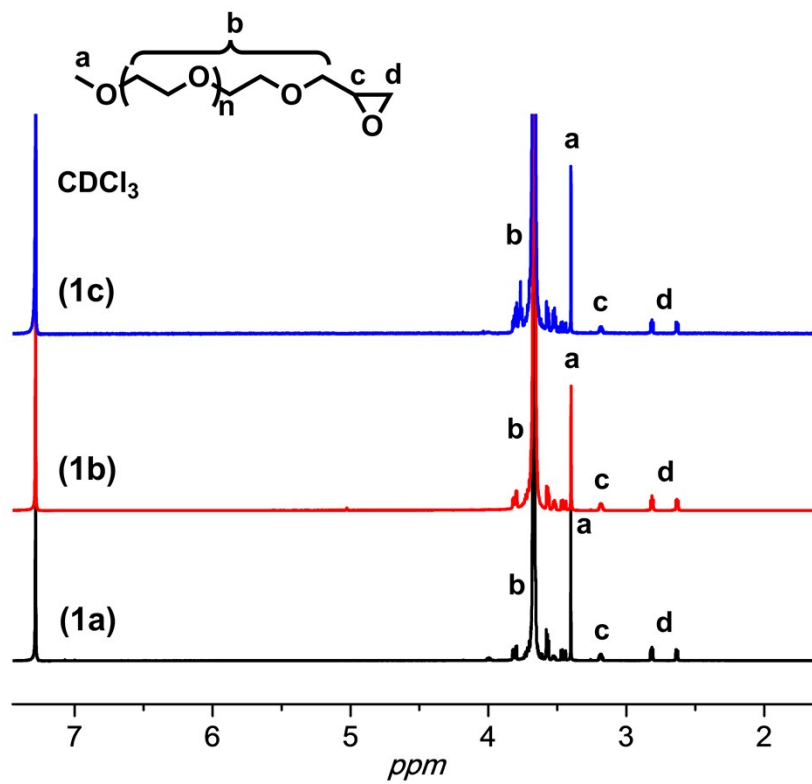

**Fig. S1** <sup>1</sup>H NMR spectra of MPEG<sub>1k</sub>-epoxide (1a-1c) in CDCl<sub>3</sub>.

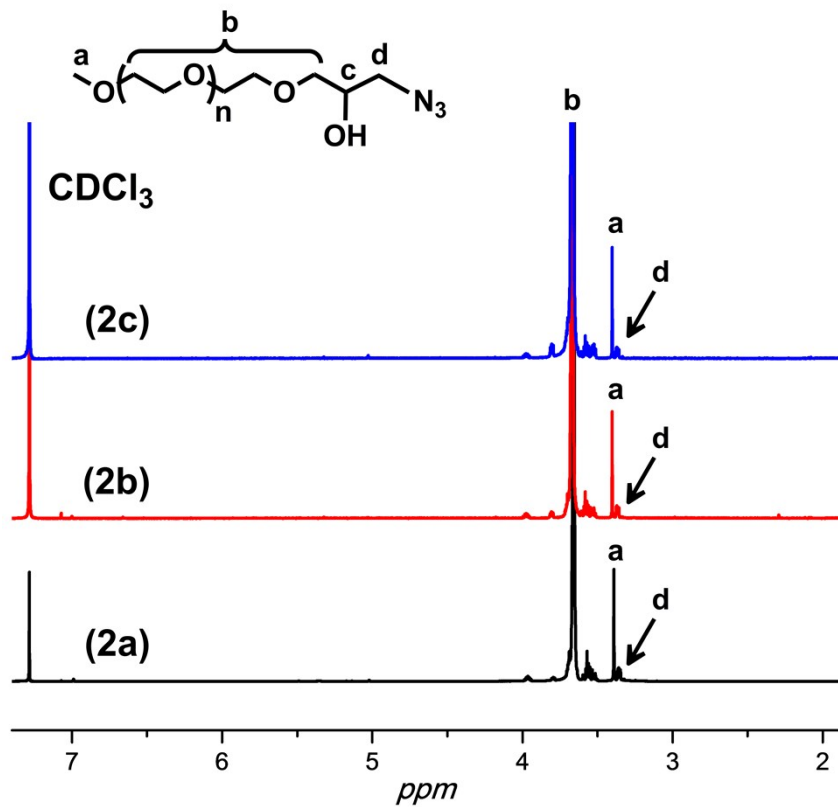

**Fig. S2** <sup>1</sup>H NMR spectra of MPEG-(OH)(N<sub>3</sub>) (2a-2c) in CDCl<sub>3</sub>.

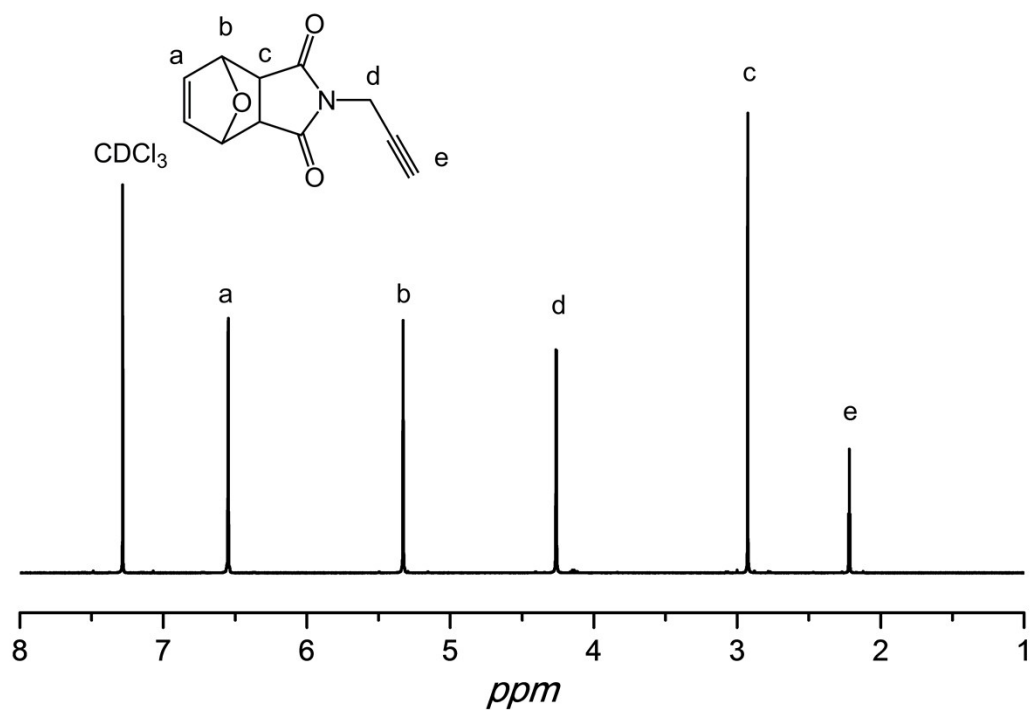

**Fig. S3** <sup>1</sup>H NMR spectrum of furan-*N*-propargylmaleimide (7) in CDCl<sub>3</sub>.

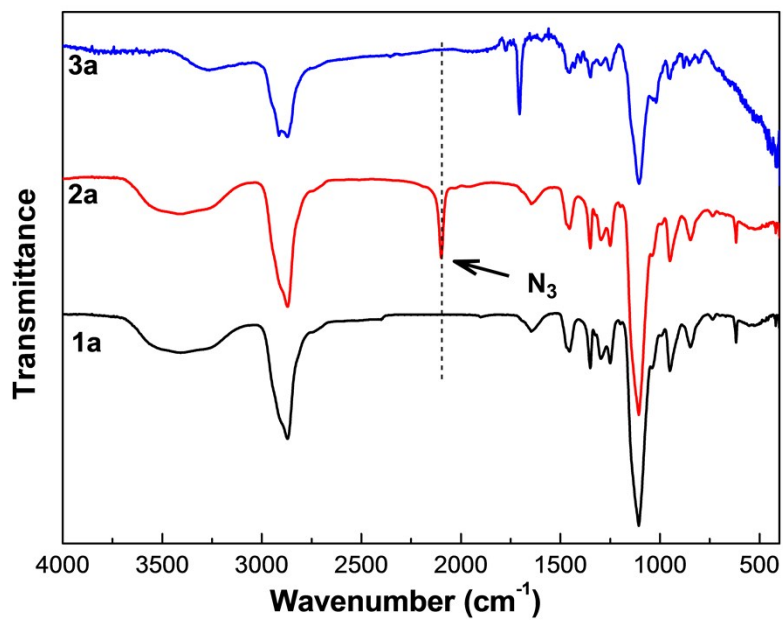

Fig. S4 IR spectra of 1a, 2a and 3a.

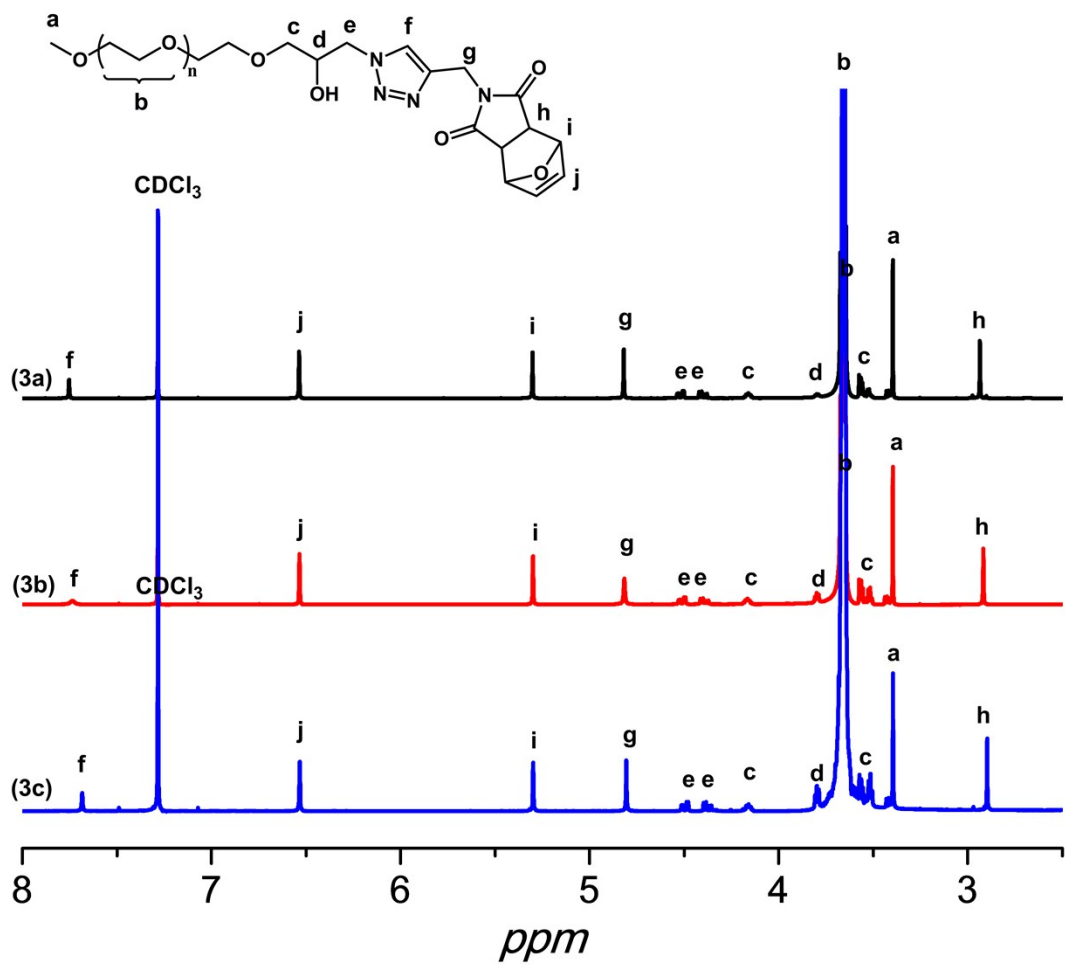

Fig. S5  $^1\text{H}$  NMR spectra of MPEG-(OH)(FM) (3a-3c) in  $\text{CDCl}_3$ .

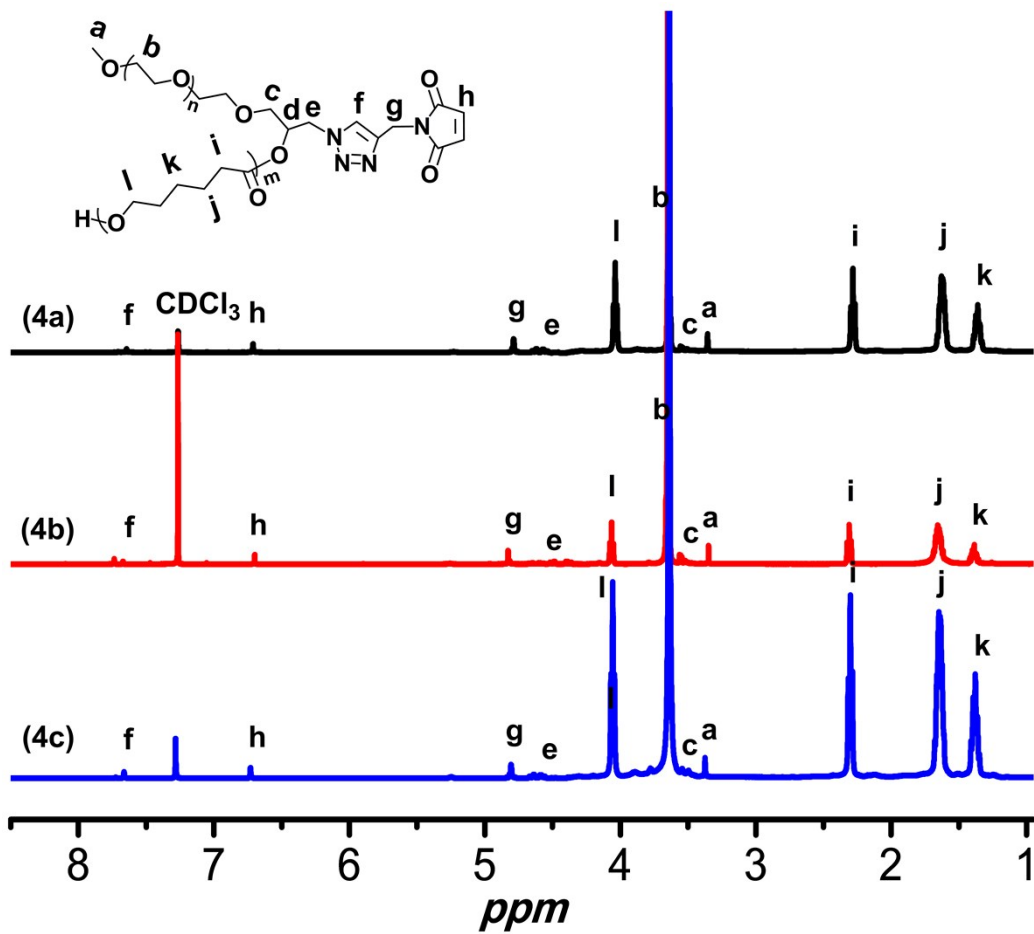

Fig. S6 <sup>1</sup>H NMR spectra of MPEG-*b*-PCL(MI) (4a-4c) in CDCl<sub>3</sub>.



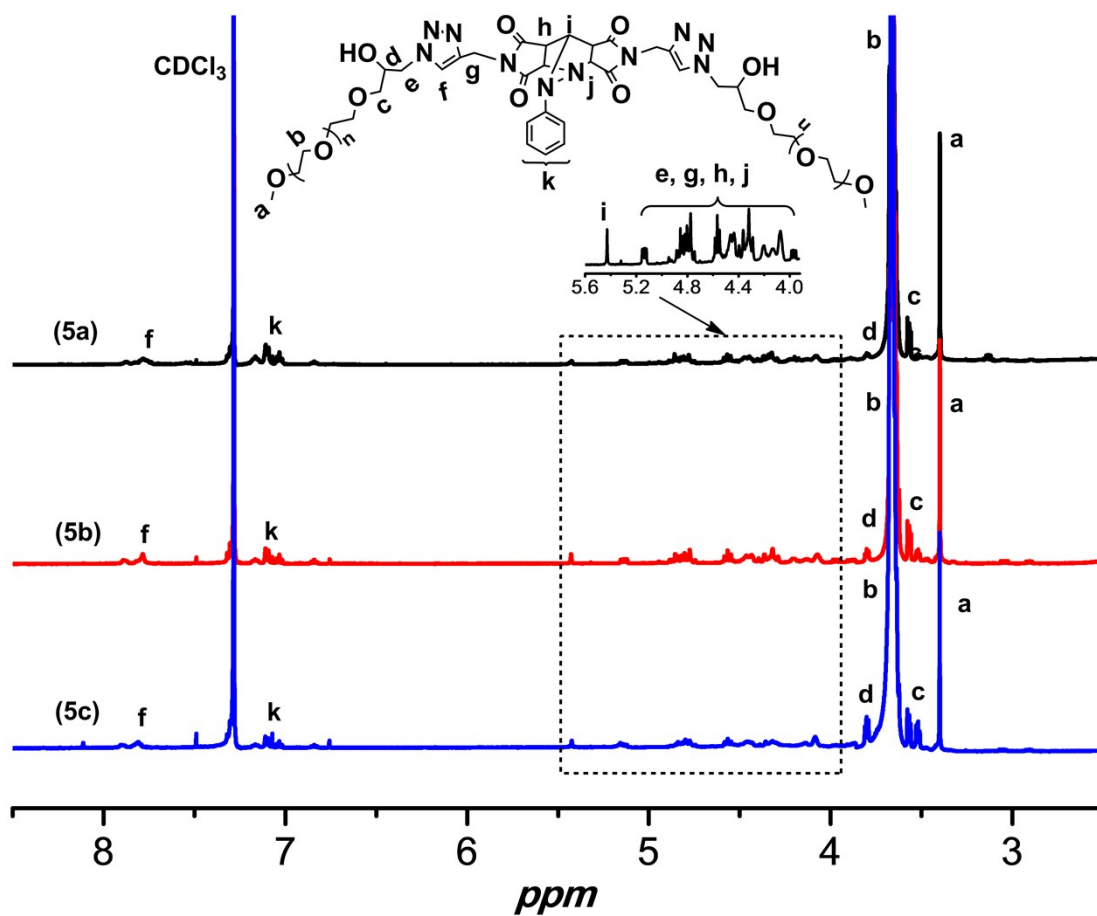

Fig. S7  $^1\text{H}$  NMR spectra of  $(\text{MPEG})_2(\text{OH})_2$  (5a-5c) in  $\text{CDCl}_3$ .

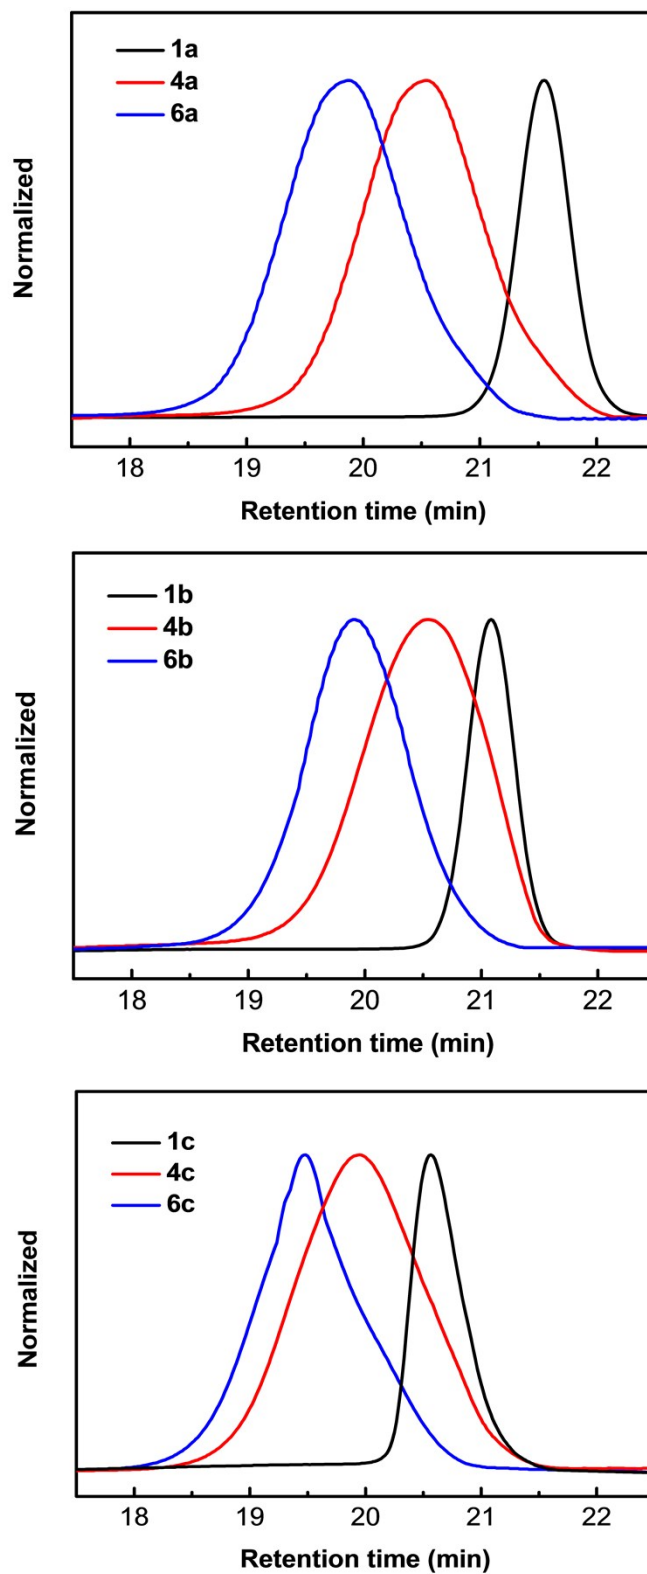

**Fig. S8** GPC traces of  $\text{MPEG}_{1k}$ -epoxide (1a-1c),  $\text{MPEG-}b\text{-PCL}(MI)$  (4a-4c) and  $(\text{MPEG})_2(\text{PCL})_2$  (6a-6c) prepared by the “Coupling-onto” approach.

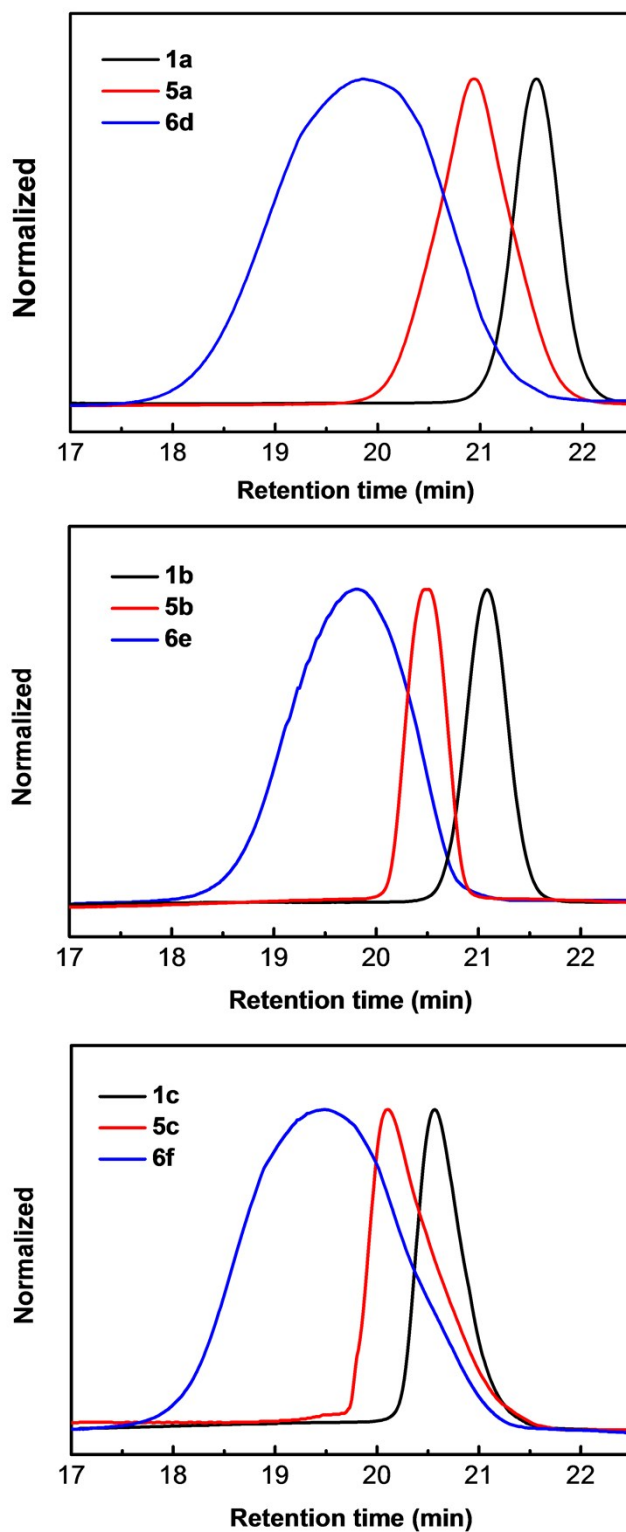

**Fig. S9** GPC traces of  $\text{MPEG}_{1k}$ -epoxide (1a-1c),  $(\text{MPEG})_2(\text{OH})_2$  (5a-5c) and  $(\text{MPEG})_2(\text{PCL})_2$  (6d-6f) prepared by the “In-out” approach.

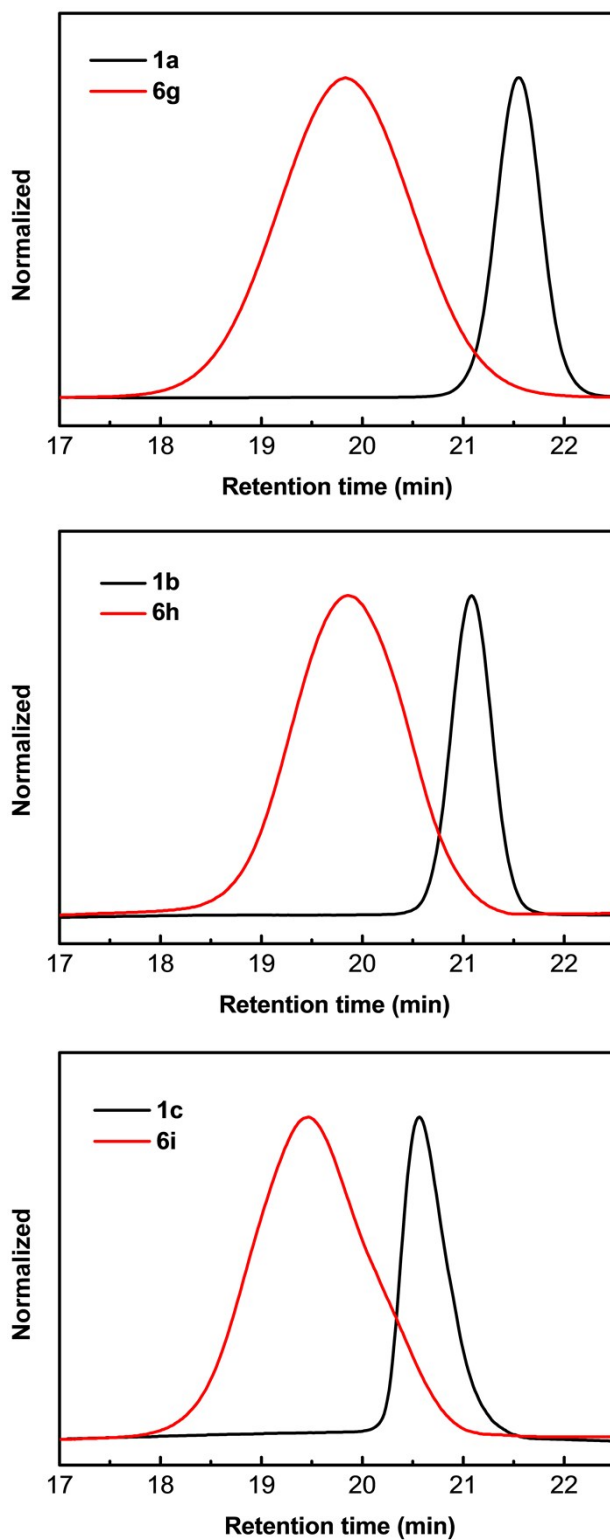

**Fig. S10** GPC traces of  $\text{MPEG}_{1k}$ -epoxide (**1a-1c**) and  $(\text{MPEG})_2(\text{PCL})_2$  (**6g-6i**) prepared by the “One-pot” approach.

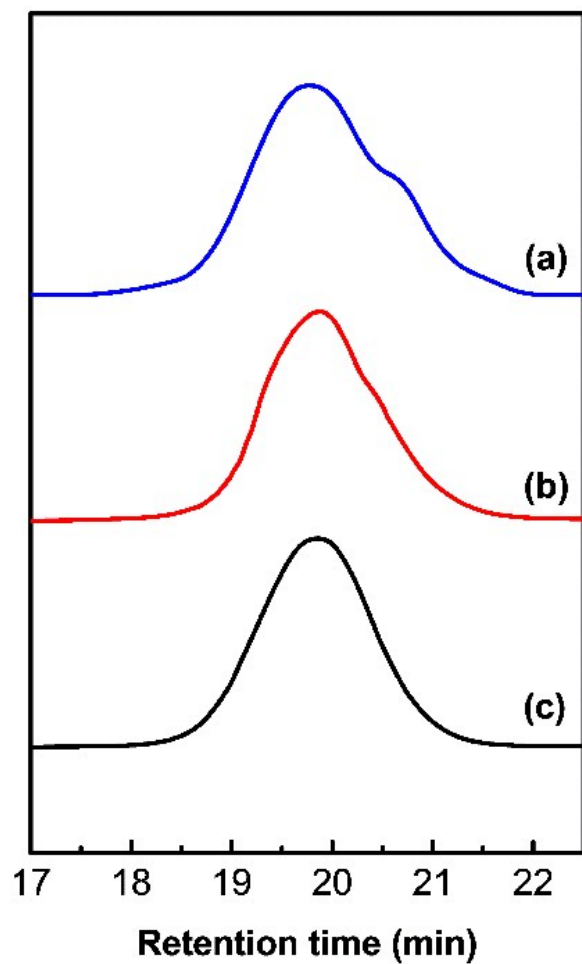

Fig. S11 GPC traces of the crude  $(\text{MPEG}_{1\text{k}})_2(\text{PCL}_{2\text{k}})_2$  (6a) prepared by various mole ratio of *N*-phenylsydnone to  $\text{MPEG}_{1\text{k}}\text{-}b\text{-PCL}_{2\text{k}}(MI)$ : (a) 1:1, (b) 2:1, (c) 4:1.

**Table S1** Solubility of the *N*-phenylsydnone in various solvents<sup>a</sup>

| Compound                | Solvents <sup>b</sup> |      |      |                                 |                   |                    |                                  |     |                  |
|-------------------------|-----------------------|------|------|---------------------------------|-------------------|--------------------|----------------------------------|-----|------------------|
|                         | DMF                   | DMAc | DMSO | CH <sub>2</sub> Cl <sub>2</sub> | CHCl <sub>3</sub> | CH <sub>3</sub> OH | C <sub>2</sub> H <sub>5</sub> OH | EA  | THF              |
| <i>N</i> -phenylsydnone | ++                    | ++   | ++   | ++                              | ++                | ++                 | ++                               | ++  | ++               |
|                         | DEE                   | DIOX | IPA  | Tolene                          | Acetone           | Hexane             | PE                               | CYH | H <sub>2</sub> O |
|                         | ++                    | ++   | ++   | ++                              | ++                | +                  | +                                | +   | -                |

<sup>a</sup> ++: soluble; +: partially soluble; -: insoluble

<sup>b</sup> Abbreviations: DMF, *N,N*-dimethylformamide; DMAc, *N,N*-dimethylacetamide; DMSO, dimethyl sulfoxide; EA, ethyl acetate; THF, tetrahydrofuran; DEE, diethyl ether; DIOX, 1,4-dioxane; IPA, isopropanol; PE, petroleum ether; CYH, cyclohexane.

**Table S2** The Characterization of synthesized polymers

| No. | Sample                                                               | Yield (%) | $M_n^a$ (KDa) | $M_n^b$ (KDa) | PDI <sup>b</sup> |
|-----|----------------------------------------------------------------------|-----------|---------------|---------------|------------------|
| 3a  | MPEG <sub>1k</sub> -(OH)(FM)                                         | 80        | 1.3           | 2.1           | 1.01             |
| 3b  | MPEG <sub>2k</sub> -(OH)(FM)                                         | 87        | 2.3           | 2.7           | 1.01             |
| 3c  | MPEG <sub>4k</sub> -(OH)(FM)                                         | 85        | 4.3           | 4.1           | 1.05             |
| 4a  | MPEG <sub>1k</sub> -b-PCL <sub>2k</sub> (MI)                         | 95        | 3.6           | 3.1           | 1.19             |
| 4b  | MPEG <sub>2k</sub> -b-PCL <sub>1k</sub> (MI)                         | 96        | 3.6           | 3.3           | 1.17             |
| 4c  | MPEG <sub>4k</sub> -b-PCL <sub>4k</sub> (MI)                         | 98        | 8.1           | 7.7           | 1.23             |
| 5a  | (MPEG <sub>1k</sub> ) <sub>2</sub> (OH) <sub>2</sub>                 | 88        | 2.5           | 2.8           | 1.08             |
| 5b  | (MPEG <sub>2k</sub> ) <sub>2</sub> (OH) <sub>2</sub>                 | 90        | 4.5           | 4.0           | 1.06             |
| 5c  | (MPEG <sub>4k</sub> ) <sub>2</sub> (OH) <sub>2</sub>                 | 85        | 8.5           | 6.9           | 1.12             |
| 6a  | (MPEG <sub>1k</sub> ) <sub>2</sub> (PCL <sub>2k</sub> ) <sub>2</sub> | 92        | 7.3           | 6.3           | 1.20             |
| 6b  | (MPEG <sub>2k</sub> ) <sub>2</sub> (PCL <sub>1k</sub> ) <sub>2</sub> | 91        | 7.3           | 6.2           | 1.18             |
| 6c  | (MPEG <sub>4k</sub> ) <sub>2</sub> (PCL <sub>4k</sub> ) <sub>2</sub> | 86        | 16.3          | 14.4          | 1.24             |
| 6d  | (MPEG <sub>1k</sub> ) <sub>2</sub> (PCL <sub>2k</sub> ) <sub>2</sub> | 95        | 7.2           | 6.1           | 1.35             |
| 6e  | (MPEG <sub>2k</sub> ) <sub>2</sub> (PCL <sub>1k</sub> ) <sub>2</sub> | 93        | 8.3           | 7.3           | 1.23             |
| 6f  | (MPEG <sub>4k</sub> ) <sub>2</sub> (PCL <sub>4k</sub> ) <sub>2</sub> | 87        | 16.9          | 14.0          | 1.33             |
| 6g  | (MPEG <sub>1k</sub> ) <sub>2</sub> (PCL <sub>2k</sub> ) <sub>2</sub> | 88        | 7.3           | 6.6           | 1.22             |
| 6h  | (MPEG <sub>2k</sub> ) <sub>2</sub> (PCL <sub>1k</sub> ) <sub>2</sub> | 92        | 8.1           | 6.4           | 1.20             |
| 6i  | (MPEG <sub>4k</sub> ) <sub>2</sub> (PCL <sub>4k</sub> ) <sub>2</sub> | 86        | 17.7          | 14.6          | 1.23             |
| 6j  | (MPEG <sub>2k</sub> ) <sub>2</sub> (PCL <sub>2k</sub> ) <sub>2</sub> | 90        | 9.3           | 8.2           | 1.26             |
| 6k  | (MPEG <sub>2k</sub> ) <sub>2</sub> (PCL <sub>5k</sub> ) <sub>2</sub> | 85        | 15.1          | 12.1          | 1.31             |

<sup>a</sup> Determined by <sup>1</sup>H NMR;

<sup>b</sup> Determined by GPC in THF with calibrated PS standards at 35 °C.

**Table S3** The efficiency of SMDC reaction under various mole ratio of reactants

| No | Mole Ratio                                                                              | Efficiency <sup>a</sup> |
|----|-----------------------------------------------------------------------------------------|-------------------------|
|    | <i>N</i> -phenylsydnone: MPEG <sub>1k</sub> - <i>b</i> -PCL <sub>2k</sub> ( <i>MI</i> ) | (%)                     |
| 1  | 1:1                                                                                     | ~85                     |
| 2  | 2:1                                                                                     | ~94                     |
| 3  | 4:1                                                                                     | ~100                    |

<sup>a</sup> Determined by <sup>1</sup>H NMR.
